# Supplementary material for: Molecular quantum cellular automata cell design trade-offs: latching vs. power dissipation
Source: Royal Society of Chemistry journal article supplement (doi:10.1039/c8cp02886a), 2018-01-01
Supplement: c8cp02886a1.pdf [file c8cp02886a1.pdf]

## Molecular Quantum Cellular Automata Cell Design Trade-offs: Latching vs Power Dissipation

Ehsan Rahimi<sup>a</sup> and Jeffrey R. Reimers<sup>bc</sup>

### Electronic Supporting Information

#### UHF/STO-3G Cs charge localized local minimum

|   |           |           |           |
|---|-----------|-----------|-----------|
| 6 | -0.003372 | -3.857163 | 1.230307  |
| 1 | 0.211755  | -3.374890 | 2.173578  |
| 1 | -0.421984 | -4.853210 | 1.265525  |
| 6 | 0.268260  | -3.225081 | 0.000000  |
| 6 | -0.003372 | -3.857163 | -1.230307 |
| 1 | -0.421984 | -4.853210 | -1.265525 |
| 1 | 0.211755  | -3.374890 | -2.173578 |
| 6 | 0.841045  | -1.801261 | 0.000000  |
| 1 | 1.468000  | -1.657766 | 0.877715  |
| 1 | 1.468000  | -1.657766 | -0.877715 |
| 6 | -0.279273 | -0.731554 | 0.000000  |
| 1 | -0.909788 | -0.864577 | 0.877128  |
| 1 | -0.909788 | -0.864577 | -0.877128 |
| 6 | 0.294604  | 0.703128  | 0.000000  |
| 1 | 0.922295  | 0.848153  | -0.877854 |
| 1 | 0.922295  | 0.848153  | 0.877854  |
| 6 | -0.836004 | 1.765467  | 0.000000  |
| 1 | -1.465367 | 1.638497  | 0.878833  |
| 1 | -1.465367 | 1.638497  | -0.878833 |
| 6 | -0.283291 | 3.197721  | 0.000000  |
| 6 | -0.003372 | 3.888507  | -1.171206 |
| 1 | 0.409759  | 4.906171  | -1.166319 |
| 1 | -0.190229 | 3.444289  | -2.159279 |
| 6 | -0.003372 | 3.888507  | 1.171206  |
| 1 | 0.409759  | 4.906171  | 1.166319  |
| 1 | -0.190229 | 3.444289  | 2.159279  |

#P scf/sto-3g freq

Full point group

CS

NOp 2

SCF Done: E(UHF) = -383.053634847 A.U. after 18 cycles

Frequencies -- 23.5674 38.5068 40.7991

Sum of electronic and thermal Free Energies= -382.828103

#### UHF/STO-3G C2h charge delocalized local minimum

|   |           |           |           |
|---|-----------|-----------|-----------|
| 6 | -1.443100 | 3.587170  | 1.198493  |
| 1 | -1.456452 | 3.083123  | 2.163130  |
| 1 | -1.431973 | 4.675584  | 1.212423  |
| 6 | -1.452042 | 2.874459  | 0.000000  |
| 6 | -1.443100 | 3.587170  | -1.198493 |
| 1 | -1.431973 | 4.675584  | -1.212423 |
| 1 | -1.456452 | 3.083123  | -2.163130 |
| 6 | -1.443100 | 1.341083  | 0.000000  |
| 1 | -1.976060 | 0.981778  | 0.877961  |
| 1 | -1.976060 | 0.981778  | -0.877961 |
| 6 | -0.002228 | 0.771997  | 0.000000  |
| 1 | 0.529909  | 1.136502  | 0.877141  |
| 1 | 0.529909  | 1.136502  | -0.877141 |
| 6 | 0.002228  | -0.771997 | 0.000000  |
| 1 | -0.529909 | -1.136502 | -0.877141 |
| 1 | -0.529909 | -1.136502 | 0.877141  |
| 6 | 1.443100  | -1.341083 | 0.000000  |

|   |          |           |           |
|---|----------|-----------|-----------|
| 1 | 1.976060 | -0.981778 | 0.877961  |
| 1 | 1.976060 | -0.981778 | -0.877961 |
| 6 | 1.452042 | -2.874459 | 0.000000  |
| 6 | 1.443100 | -3.587170 | -1.198493 |
| 1 | 1.431973 | -4.675584 | -1.212423 |
| 1 | 1.456452 | -3.083123 | -2.163130 |
| 6 | 1.443100 | -3.587170 | 1.198493  |
| 1 | 1.431973 | -4.675584 | 1.212423  |
| 1 | 1.456452 | -3.083123 | 2.163130  |

```
#P scf/sto-3g freq
Full point group          C2H      NOp    4
SCF Done:  E(UHF) = -383.013362444  A.U. after 16 cycles
Frequencies --      23.0245              37.9791      39.1082
Sum of electronic and thermal Free Energies= -382.786713
```

**CASSCF(1,2)/6-31G\* C1 charge localized and twisted local minimum**

|   |           |           |           |
|---|-----------|-----------|-----------|
| 6 | 3.969257  | -1.123166 | -0.077238 |
| 1 | 3.635791  | -2.109066 | 0.192849  |
| 1 | 4.949311  | -1.050481 | -0.513098 |
| 6 | 3.214538  | -0.043159 | 0.126588  |
| 6 | 3.676062  | 1.277978  | -0.227704 |
| 1 | 4.639335  | 1.418033  | -0.677703 |
| 1 | 3.101041  | 2.153992  | 0.004259  |
| 6 | 1.827880  | -0.162110 | 0.728962  |
| 1 | 1.713965  | -1.142541 | 1.180075  |
| 1 | 1.718447  | 0.566014  | 1.529776  |
| 6 | 0.715271  | 0.051491  | -0.306220 |
| 1 | 0.827148  | -0.681653 | -1.100531 |
| 1 | 0.826168  | 1.028122  | -0.769589 |
| 6 | -0.682442 | -0.063885 | 0.305449  |
| 1 | -0.798717 | 0.671381  | 1.099198  |
| 1 | -0.799092 | -1.040192 | 0.771820  |
| 6 | -1.790475 | 0.135919  | -0.741272 |
| 1 | -1.686436 | -0.594113 | -1.536459 |
| 1 | -1.692621 | 1.111094  | -1.205552 |
| 6 | -3.179873 | 0.014728  | -0.144038 |
| 6 | -3.873974 | 1.088560  | 0.367274  |
| 1 | -4.848401 | 0.977298  | 0.807831  |
| 1 | -3.470318 | 2.085927  | 0.340248  |
| 6 | -3.852526 | -1.183314 | -0.048147 |
| 1 | -4.827322 | -1.253119 | 0.400030  |
| 1 | -3.430605 | -2.098948 | -0.425072 |

```
#P cas(1,2)/6-31G* freq
Full point group          C1      NOp    1
( 1)  EIGENVALUE -387.6315185988
Frequencies --      279.1857              329.1523      386.4387
Sum of electronic and thermal Free Energies= -387.206503
```

**CASSCF(1,2)/STO-3G Cs charge localized local minimum**

|   |           |           |           |
|---|-----------|-----------|-----------|
| 6 | 0.000783  | 3.826337  | 1.199117  |
| 1 | -0.220342 | 3.357446  | 2.140337  |
| 1 | 0.424957  | 4.812271  | 1.233725  |
| 6 | -0.261850 | 3.206581  | -0.000000 |
| 6 | 0.000783  | 3.826337  | -1.199117 |
| 1 | 0.424957  | 4.812271  | -1.233725 |
| 1 | -0.220342 | 3.357446  | -2.140337 |
| 6 | -0.827924 | 1.795153  | -0.000000 |
| 1 | -1.462037 | 1.658411  | 0.871068  |
| 1 | -1.462037 | 1.658411  | -0.871068 |
| 6 | 0.274390  | 0.728121  | -0.000000 |
| 1 | 0.909322  | 0.868873  | 0.870779  |
| 1 | 0.909322  | 0.868873  | -0.870779 |
| 6 | -0.286279 | -0.695656 | 0.000000  |

|   |           |           |           |
|---|-----------|-----------|-----------|
| 1 | -0.921975 | -0.840437 | -0.871396 |
| 1 | -0.921975 | -0.840437 | 0.871396  |
| 6 | 0.827223  | -1.755513 | 0.000000  |
| 1 | 1.463694  | -1.626161 | 0.868585  |
| 1 | 1.463694  | -1.626161 | -0.868585 |
| 6 | 0.280057  | -3.170608 | 0.000000  |
| 6 | 0.000783  | -3.867434 | -1.154610 |
| 1 | -0.408433 | -4.861544 | -1.133062 |
| 1 | 0.188569  | -3.446508 | -2.127347 |
| 6 | 0.000783  | -3.867434 | 1.154610  |
| 1 | -0.408433 | -4.861544 | 1.133062  |
| 1 | 0.188569  | -3.446508 | 2.127347  |

#P cas(1,2)/6-31G\* freq

Full point group CS NOp 2  
 ( 1) EIGENVALUE -387.6277002562  
 Frequencies -- 286.6997 328.5673 590.8918  
 Sum of electronic and thermal Free Energies= -386.526167

**CASSCF(1,2)/6-31G\* C2h geometry but broken symmetry  
 wavefunction results**

|   |            |            |            |
|---|------------|------------|------------|
| 6 | 0.0000000  | 3.8468855  | 1.1768635  |
| 1 | -0.2044555 | 3.4019770  | 2.1338420  |
| 1 | 0.4166950  | 4.8369075  | 1.1833935  |
| 6 | -0.2709535 | 3.1885945  | 0.0000000  |
| 6 | 0.0000000  | 3.8468855  | -1.1768635 |
| 1 | 0.4166950  | 4.8369075  | -1.1833935 |
| 1 | -0.2044555 | 3.4019770  | -2.1338420 |
| 6 | -0.8275735 | 1.7753330  | 0.0000000  |
| 1 | -1.4628655 | 1.6422860  | 0.8698265  |
| 1 | -1.4628655 | 1.6422860  | -0.8698265 |
| 6 | 0.2803345  | 0.7118885  | 0.0000000  |
| 1 | 0.9156485  | 0.8546550  | 0.8710875  |
| 1 | 0.9156485  | 0.8546550  | -0.8710875 |
| 6 | -0.2803345 | -0.7118885 | 0.0000000  |
| 1 | -0.9156485 | -0.8546550 | -0.8710875 |
| 1 | -0.9156485 | -0.8546550 | 0.8710875  |
| 6 | 0.8275735  | -1.7753330 | 0.0000000  |
| 1 | 1.4628655  | -1.6422860 | 0.8698265  |
| 1 | 1.4628655  | -1.6422860 | -0.8698265 |
| 6 | 0.2709535  | -3.1885945 | 0.0000000  |
| 6 | 0.0000000  | -3.8468855 | -1.1768635 |
| 1 | -0.4166950 | -4.8369075 | -1.1833935 |
| 1 | 0.2044555  | -3.4019770 | -2.1338420 |
| 6 | 0.0000000  | -3.8468855 | 1.1768635  |
| 1 | -0.4166950 | -4.8369075 | 1.1833935  |
| 1 | 0.2044555  | -3.4019770 | 2.1338420  |

( 1) EIGENVALUE -387.6261300864

**B3LYP/6-31G\* C2h minimum**

|   |           |           |           |
|---|-----------|-----------|-----------|
| 6 | -1.436423 | 3.577997  | 1.191285  |
| 1 | -1.461890 | 3.079807  | 2.156339  |
| 1 | -1.415702 | 4.663987  | 1.198473  |
| 6 | -1.443901 | 2.863651  | 0.000000  |
| 6 | -1.436423 | 3.577997  | -1.191285 |
| 1 | -1.415702 | 4.663987  | -1.198473 |
| 1 | -1.461890 | 3.079807  | -2.156339 |
| 6 | -1.436423 | 1.345134  | 0.000000  |
| 1 | -1.980593 | 0.979771  | 0.878938  |
| 1 | -1.980593 | 0.979771  | -0.878938 |
| 6 | -0.006813 | 0.766652  | 0.000000  |
| 1 | 0.536607  | 1.142156  | 0.878325  |
| 1 | 0.536607  | 1.142156  | -0.878325 |
| 6 | 0.006813  | -0.766652 | 0.000000  |

|   |           |           |           |
|---|-----------|-----------|-----------|
| 1 | -0.536607 | -1.142156 | -0.878325 |
| 1 | -0.536607 | -1.142156 | 0.878325  |
| 6 | 1.436423  | -1.345134 | 0.000000  |
| 1 | 1.980593  | -0.979771 | 0.878938  |
| 1 | 1.980593  | -0.979771 | -0.878938 |
| 6 | 1.443901  | -2.863651 | 0.000000  |
| 6 | 1.436423  | -3.577997 | -1.191285 |
| 1 | 1.415702  | -4.663987 | -1.198473 |
| 1 | 1.461890  | -3.079807 | -2.156339 |
| 6 | 1.436423  | -3.577997 | 1.191285  |
| 1 | 1.415702  | -4.663987 | 1.198473  |
| 1 | 1.461890  | -3.079807 | 2.156339  |

#P b3lyp/6-31G\* freq

Full point group

C2H

NOp 4

SCF Done: E(UB3LYP) = -390.329687083

A.U. after 15 cycles

Frequencies -- 26.0787

37.4941

39.7178

Sum of electroni
